# Supplementary material
Source: PubMed Central journal article supplement (PMC2048739)

A) Mock

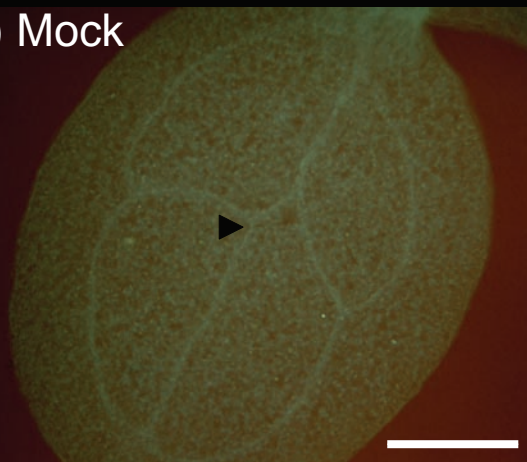

B) PMR4 + DCB 2h

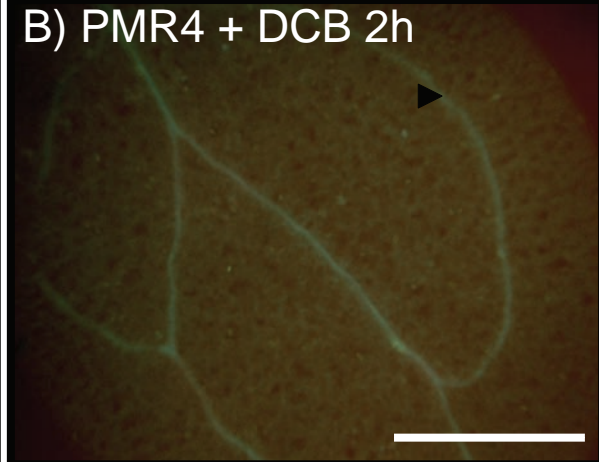

C) DCB 2h

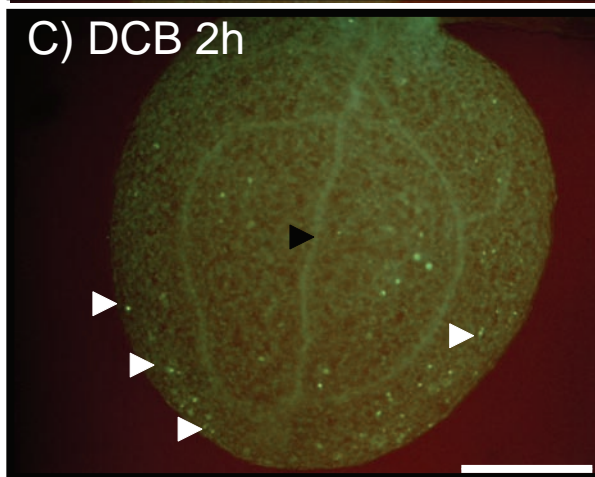

D) Isoxaben 2h

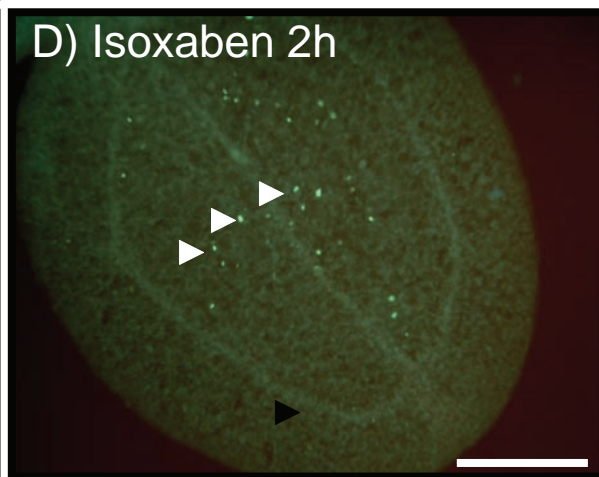

E) Isoxaben 2h

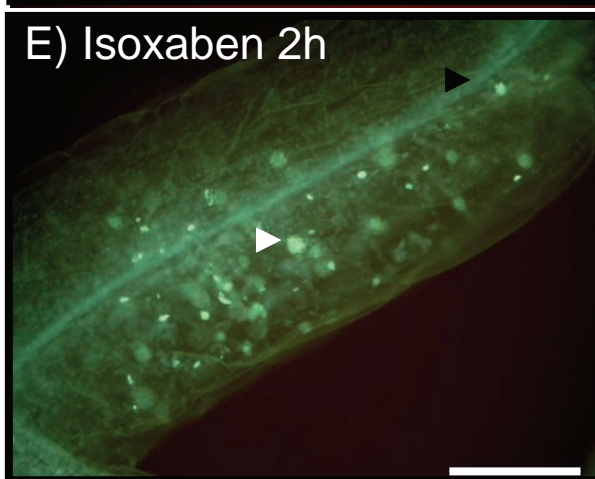

Supplement: plntphys_145_2_334__1.pdf [file plntphys_145_2_334__1.pdf]

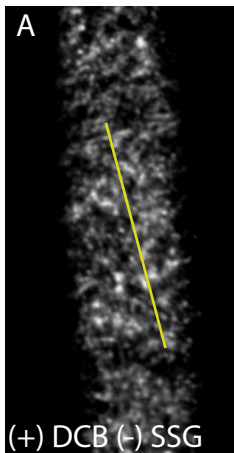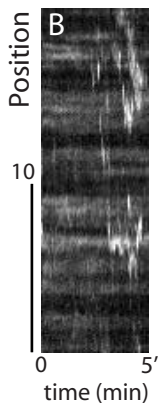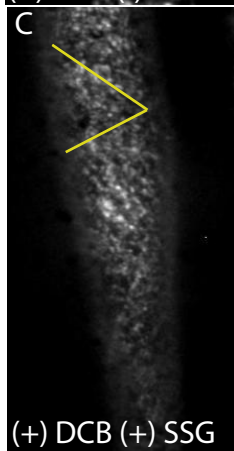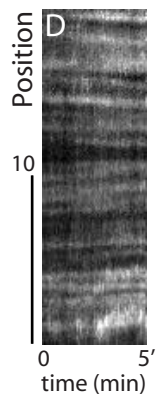

Supplement: plntphys_145_2_334__2.pdf [file plntphys_145_2_334__2.pdf]
